# Supplementary figures and images for: Combination Varenicline/Bupropion Treatment Benefits Highly Dependent Smokers in an Adaptive Smoking Cessation Paradigm
Source: PubMed Central journal article supplement — Nicotine Tob Res. 2016 Nov 8;19(8):999–1002. doi: 10.1093/ntr/ntw283 (PMC5896474; doi:10.1093/ntr/ntw283), 2016-11-08

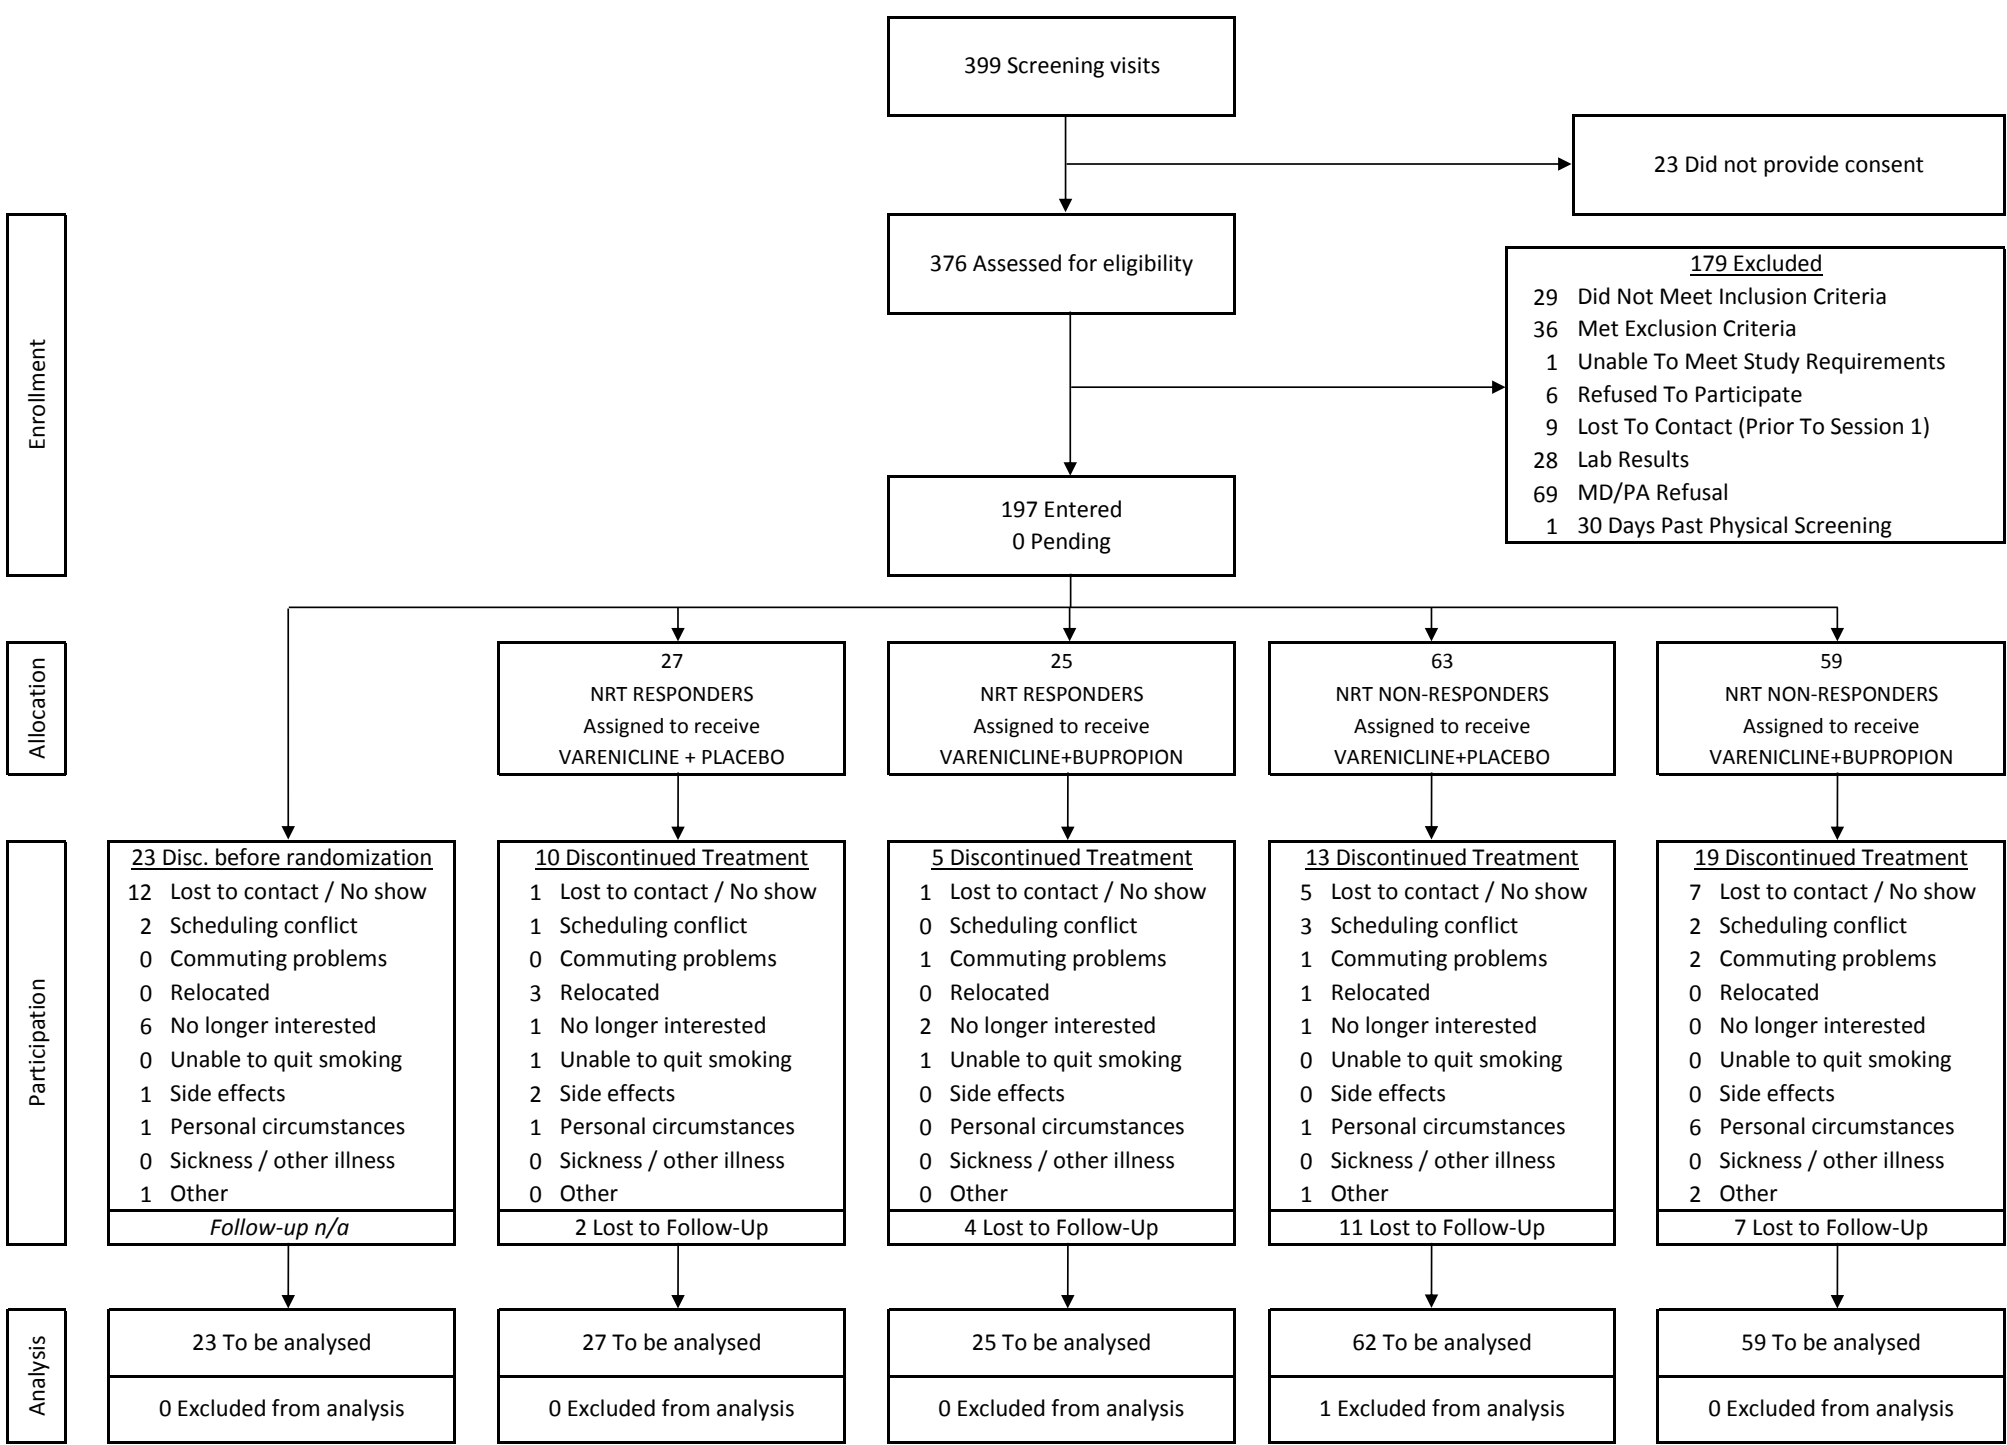

Supplement: ntw283_suppl_supplementary_figure_s1.pdf [file ntw283_suppl_supplementary_figure_s1.pdf]
